# Supplementary material
Source: Springer Nature journal article supplement (https://www.springermedizin.de/resource/supplementary/12884_2011_483_MOESM7_ESM.pdf/9457918)

WHO-criteria

| GDM    |       | Non-GDM |       |
|--------|-------|---------|-------|
| Events | Total | Events  | Total |

|            |   |     |    |      |
|------------|---|-----|----|------|
| Aberg 2001 | 1 | 126 | 13 | 4515 |
|------------|---|-----|----|------|

|           |    |     |     |      |
|-----------|----|-----|-----|------|
| EBDG 2001 | 12 | 330 | 101 | 4101 |
|-----------|----|-----|-----|------|

|       |    |     |     |      |
|-------|----|-----|-----|------|
| Total | 13 | 456 | 114 | 8616 |
|-------|----|-----|-----|------|

Heterogeneity:  $Q=0.3$ ,  $p=0.562$ ;  $I^2=0\%$   
 Overall effect:  $p=0.128$

IADPSG-criteria

|           |    |     |    |      |
|-----------|----|-----|----|------|
| EBDG 2001 | 27 | 812 | 86 | 3619 |
|-----------|----|-----|----|------|

Overall effect:  $p=0.122$

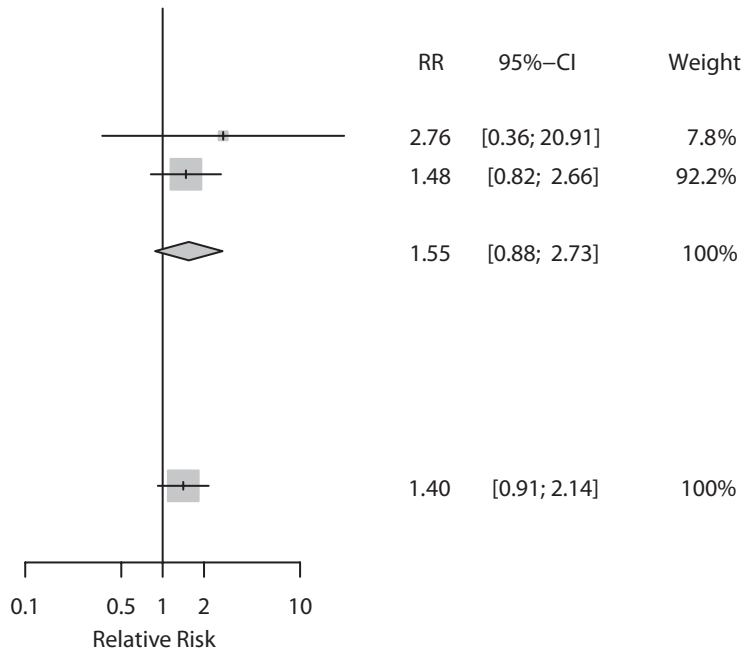

Supplement: MOESM7 [file 9457918]
